# Supplementary material
Source: MDPI journal article supplement (https://www.mdpi.com/2073-4352/11/8/982)
Supplement: s1 [file s1]

## Supplementary Materials

### **An N4-tetradentate hydrazone ligand that binds in a neutral, mono- and bisdeprotonated form to iron(II) and zinc(II) metal ions**

**Devaraj Pandiarajan, Thomas Fox and Bernhard Spingler\***

*University of Zürich, Department of Chemistry, Winterthurerstr. 190,  
CH-8057 Zürich, Switzerland.*

*Fax: +41 44 635 68 02; E-mail: spingler@chem.uzh.ch.*

| <b>Contents</b>                                                    | <b>Pages</b> |
|--------------------------------------------------------------------|--------------|
| Figure S1: <sup>1</sup> H-NMR spectrum of <b>3</b>                 | S2           |
| Figure S2: <sup>1</sup> H-NMR spectrum of <b>4</b>                 | S3           |
| Figure S3: Crystal structure of complex <b>5</b> (Asymmetric unit) | S4           |
| Table S1: Crystallographic Information                             | S5 – S6      |

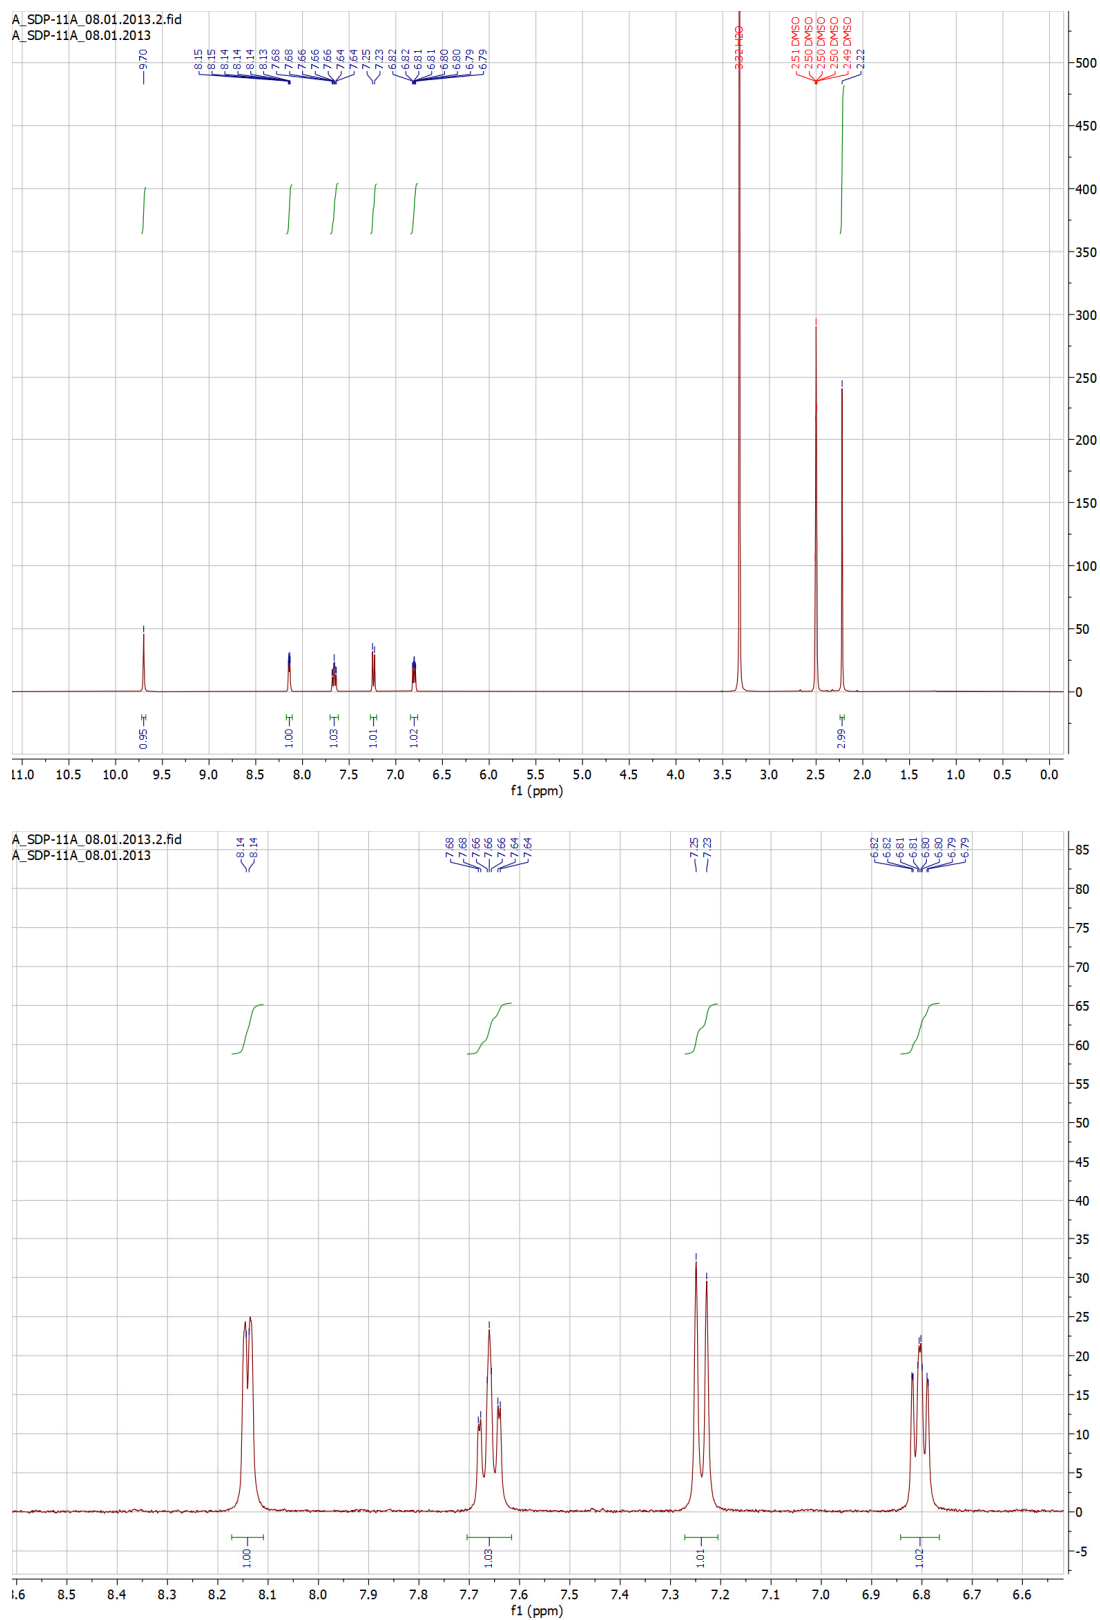

Figure S1.  $^1\text{H}$ -NMR spectrum of complex **3** in  $\text{D}_3\text{CS}(\text{O})\text{CD}_3$  including enlargement of aromatic region.



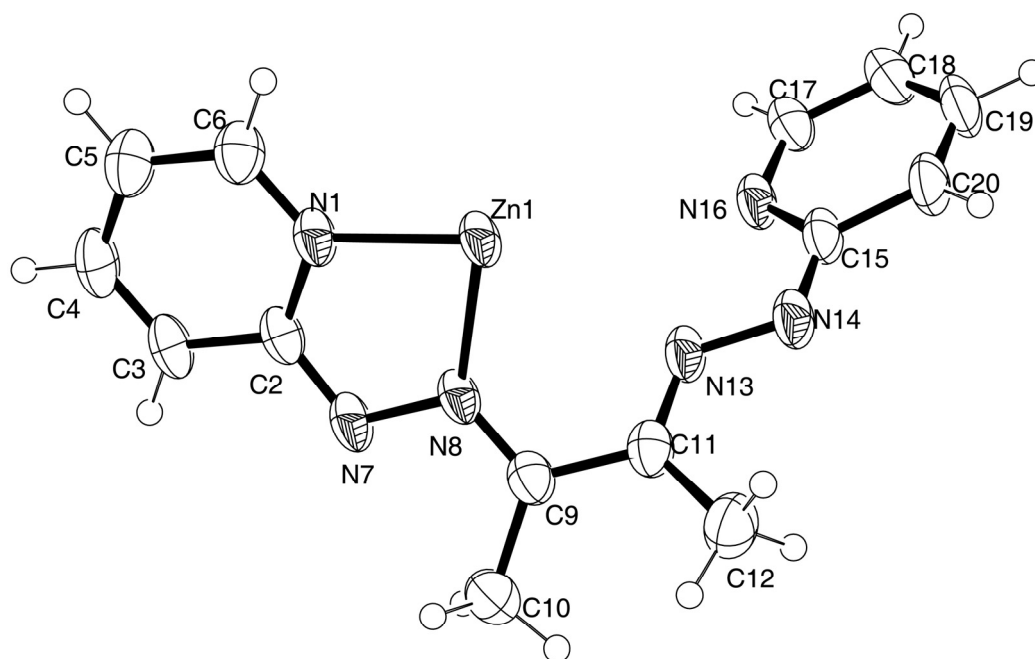

Figure S3. ORTEP representation of an asymmetric unit of the Zn-Zn dimer (**5**)

Table S1. Crystal data and structure refinement parameters for complexes **1-6**

| Compounds                                        | [Zn(LH <sub>2</sub> )Cl <sub>2</sub> ] ( <b>1</b> )               | [Zn(LH <sub>2</sub> )(OAc) <sub>2</sub> ]·H <sub>2</sub> O ( <b>2</b> ) | [Zn(LH <sub>2</sub> )(N <sub>3</sub> ) <sub>2</sub> ] ( <b>3</b> ) |
|--------------------------------------------------|-------------------------------------------------------------------|-------------------------------------------------------------------------|--------------------------------------------------------------------|
| Empirical formula                                | C <sub>14</sub> H <sub>16</sub> Cl <sub>2</sub> N <sub>6</sub> Zn | C <sub>18</sub> H <sub>24</sub> N <sub>6</sub> O <sub>5</sub> Zn        | C <sub>14</sub> H <sub>16</sub> N <sub>12</sub> Zn                 |
| Formula weight                                   | 404.60                                                            | 469.80                                                                  | 417.76                                                             |
| Wavelength [Å]                                   | 0.71073                                                           | 1.54184                                                                 | 1.54184                                                            |
| Crystal system                                   | Monoclinic                                                        | Monoclinic                                                              | Triclinic                                                          |
| Space group                                      | P 1 2/n 1                                                         | P 1 21/c 1                                                              | P-1                                                                |
| a [Å]                                            | 8.4935(5)                                                         | 8.57160(14)                                                             | 8.0537(2)                                                          |
| b [Å]                                            | 9.7578(6)                                                         | 14.6873(2)                                                              | 9.5480(3)                                                          |
| c [Å]                                            | 9.8536(6)                                                         | 16.3014(2)                                                              | 11.6897(3)                                                         |
| α [°]                                            | 90                                                                | 90                                                                      | 81.461(2)                                                          |
| β [°]                                            | 100.795(6)                                                        | 91.1754(13)                                                             | 88.337(2)                                                          |
| γ [°]                                            | 90                                                                | 90                                                                      | 77.855(3)                                                          |
| Volume [Å <sup>3</sup> ]                         | 802.19(9)                                                         | 2051.81(5)                                                              | 869.04(4)                                                          |
| Z                                                | 2                                                                 | 4                                                                       | 2                                                                  |
| Density (calculated) [Mg/m <sup>3</sup> ]        | 1.675                                                             | 1.521                                                                   | 1.596                                                              |
| Absorption coefficient [mm <sup>-1</sup> ]       | 1.871                                                             | 2.043                                                                   | 2.217                                                              |
| F(000)                                           | 412                                                               | 976                                                                     | 428                                                                |
| Crystal size [mm <sup>3</sup> ]                  | 0.22 x 0.17 x 0.04                                                | 0.12 x 0.1 x 0.06                                                       | 0.16 x 0.05 x 0.04                                                 |
| Crystal description                              | light yellow plate                                                | colorless prism                                                         | yellow needle                                                      |
| Theta range for data collection [°]              | 2.964 to 32.808                                                   | 4.052 to 74.290                                                         | 3.824 to 74.452                                                    |
| Index ranges                                     | -8 ≤ h ≤ 12, -13 ≤ k ≤ 13, -11 ≤ l ≤ 14                           | -10 ≤ h ≤ 8, -18 ≤ k ≤ 18, -20 ≤ l ≤ 19                                 | -10 ≤ h ≤ 10, -11 ≤ k ≤ 11, -14 ≤ l ≤ 14                           |
| Reflections collected                            | 5658                                                              | 12158                                                                   | 29633                                                              |
| Independent reflections                          | 2654 [R(int) = 0.0504]                                            | 4061 [R(int) = 0.0191]                                                  | 3275 [R(int) = 0.0376]                                             |
| Reflections observed                             | 2179                                                              | 3601                                                                    | 3007                                                               |
| Completeness to theta                            | 99.9 % to 25.242°                                                 | 99.6 % to 67.684°                                                       | 94.5 % to 67.684°                                                  |
| Max. and min. transmission                       | 1.00000 and 0.82475                                               | 1.00000 and 0.90121                                                     | 1.00000 and 0.79120                                                |
| Data / restraints / parameters                   | 2654 / 0 / 106                                                    | 4061 / 2 / 281                                                          | 3275 / 0 / 246                                                     |
| Goodness-of-fit on F <sup>2</sup>                | 1.027                                                             | 1.116                                                                   | 1.071                                                              |
| Final R indices [I > 2σ(I)]                      | R1 = 0.0462, wR2 = 0.1003                                         | R1 = 0.0377, wR2 = 0.0990                                               | R1 = 0.0415, wR2 = 0.1204                                          |
| R indices (all data)                             | R1 = 0.0593, wR2 = 0.1076                                         | R1 = 0.0448, wR2 = 0.1020                                               | R1 = 0.0450, wR2 = 0.1250                                          |
| Largest diff. peak and hole [e.Å <sup>-3</sup> ] | 0.930 and -0.552                                                  | 0.459 and -0.525                                                        | 0.957 and -0.735                                                   |
| CCDC number                                      | 1017003                                                           | 1017004                                                                 | 1017005                                                            |

| Compounds                                           | [Zn(LH <sub>2</sub> )OTf <sub>2</sub> ] ( <b>4</b> )                                           | [Zn <sub>2</sub> (L) <sub>2</sub> ] ( <b>5</b> )                | [Fe(LH) <sub>2</sub> ]·H <sub>2</sub> O ( <b>6</b> ) |
|-----------------------------------------------------|------------------------------------------------------------------------------------------------|-----------------------------------------------------------------|------------------------------------------------------|
| Empirical formula                                   | C <sub>16</sub> H <sub>16</sub> F <sub>6</sub> N <sub>6</sub> O <sub>6</sub> S <sub>2</sub> Zn | C <sub>28</sub> H <sub>28</sub> N <sub>12</sub> Zn <sub>2</sub> | C <sub>28</sub> H <sub>32</sub> FeN <sub>12</sub> O  |
| Formula weight                                      | 631.84                                                                                         | 663.36                                                          | 608.50                                               |
| Wavelength [Å]                                      | 1.54184                                                                                        | 1.54184                                                         | 1.54184                                              |
| Crystal system                                      | Monoclinic                                                                                     | Monoclinic                                                      | Triclinic                                            |
| Space group                                         | C2/c                                                                                           | I2/a                                                            | P-1                                                  |
| a [Å]                                               | 14.6922(4)                                                                                     | 15.3105(7)                                                      | 8.2454(2)                                            |
| b [Å]                                               | 10.5125(2)                                                                                     | 12.1441(5)                                                      | 11.0379(2)                                           |
| c [Å]                                               | 17.3013(5)                                                                                     | 15.6339(6)                                                      | 16.9513(4)                                           |
| α [°]                                               | 90                                                                                             | 90                                                              | 97.230(2)                                            |
| β [°]                                               | 120.944(4)                                                                                     | 92.310(4)                                                       | 93.365(2)                                            |
| γ [°]                                               | 90                                                                                             | 90                                                              | 110.444(2)                                           |
| Volume [Å <sup>3</sup> ]                            | 2291.88(13)                                                                                    | 2904.5(2)                                                       | 1425.33(6)                                           |
| Z                                                   | 4                                                                                              | 4                                                               | 2                                                    |
| Density (calculated)<br>[Mg/m <sup>3</sup> ]        | 1.831                                                                                          | 1.517                                                           | 1.418                                                |
| Absorption coefficient<br>[mm <sup>-1</sup> ]       | 4.106                                                                                          | 2.368                                                           | 4.619                                                |
| F(000)                                              | 1272                                                                                           | 1360                                                            | 636                                                  |
| Crystal size [mm <sup>3</sup> ]                     | 0.13 x 0.1 x 0.06                                                                              | 0.13 x 0.11 x 0.07                                              | 0.35 x 0.2 x 0.1                                     |
| Crystal description                                 | yellow plate                                                                                   | red prism                                                       | dark brown plate                                     |
| Theta range for data<br>collection [°]              | 5.306 to 76.109                                                                                | 4.612 to 75.928                                                 | 2.644 to 76.166                                      |
| Index ranges                                        | -18 ≤ h ≤ 18, -<br>10 ≤ k ≤ 12, -<br>21 ≤ l ≤ 21                                               | -14 ≤ h ≤ 17, -<br>15 ≤ k ≤ 15,<br>-19 ≤ l ≤ 19                 | -10 ≤ h ≤ 10,<br>-13 ≤ k ≤ 13,<br>-20 ≤ l ≤ 19       |
| Reflections collected                               | 13446                                                                                          | 12417                                                           | 25820                                                |
| Independent reflections                             | 2320 [R(int) = 0.0189]                                                                         | 2945 [R(int) = 0.0379]                                          | 5513 [R(int) = 0.0457]                               |
| Reflections observed                                | 2250                                                                                           | 2702                                                            | 4697                                                 |
| Completeness to theta                               | 97.9 % to 67.684°                                                                              | 98.6 % to 67.684°                                               | 94.8 % to 67.684°                                    |
| Max. and min.<br>transmission                       | 1.00000 and 0.83624                                                                            | 1.00000 and 0.68734                                             | 1.00000 and 0.55870                                  |
| Data / restraints /<br>parameters                   | 2320 / 0 / 169                                                                                 | 2945 / 0 / 192                                                  | 5513 / 2 / 395                                       |
| Goodness-of-fit on F <sup>2</sup>                   | 1.066                                                                                          | 1.119                                                           | 1.024                                                |
| Final R indices<br>[I > 2σ(I)]                      | R1 = 0.0313,<br>wR2 = 0.0867                                                                   | R1 = 0.0633,<br>wR2 = 0.1761                                    | R1 = 0.0485,<br>wR2 = 0.1271                         |
| R indices (all data)                                | R1 = 0.0318,<br>wR2 = 0.0871                                                                   | R1 = 0.0661,<br>wR2 = 0.1802                                    | R1 = 0.0598,<br>wR2 = 0.1352                         |
| Largest diff. peak and<br>hole [e.Å <sup>-3</sup> ] | 0.681 and -0.462                                                                               | 2.720 and -1.137                                                | 0.420 and -0.467                                     |
| CCDC number                                         | 1017006                                                                                        | 1017007                                                         | 1017008                                              |
